# Supplementary material for: Progression of urothelial carcinoma in situ of the urinary bladder: a switch from luminal to basal phenotype and related therapeutic implications
Source: PubMed Central journal article supplement (PMC5978840; doi:10.1007/s00428-018-2354-9), 2018-04-13
Supplement: 428_2018_2354_MOESM1_ESM.pdf [file 428_2018_2354_MOESM1_ESM.pdf]

**Progression of urothelial carcinoma *in situ* of the urinary bladder:  
a switch from luminal to basal phenotype and related therapeutic implications**

Isabella Barth, Ursula Schneider, Tobias Grimm, Alexander Karl, David Horst, Nadine T. Gaisa,  
Ruth Knüchel and Stefan Garczyk

Corresponding author:

Prof. Dr. med. Ruth Knüchel  
Institute of Pathology  
University Hospital RWTH Aachen  
Pauwelsstrasse 30, 52074 Aachen, Germany  
Email: rknuechel-clarke@ukaachen.de

| Antibody   | Source          | Clone/ Reference | Dilution (FFPE; Frozen) |
|------------|-----------------|------------------|-------------------------|
| CK20       | Dako            | Ks20.8           | 1/100; 1/200            |
| GATA3      | Biocare Medical | CM405A           | 1/250; 1/250            |
| Her2       | Dako            | Polyclonal       | 1/300; 1/500            |
| ER $\beta$ | Dako            | PPG5/10          | 1/20; 1/20              |
| CK5/6      | Dako            | D5/16 B4         | 1/100; 1/100            |
| CK14       | Abcam           | ab7800           | 1/400; 1/200            |
| p53        | Dako            | 318-6-11         | 1/50; 1/50              |

**Online resource 1: Overview of antibodies**

Abbreviations: CK – Cytokeratin, ER – Estrogen Receptor, FFPE – Formalin-fixed, paraffin embedded, Her2 – Human epidermal growth factor receptor 2
