# Supplementary material for: Progression of urothelial carcinoma in situ of the urinary bladder: a switch from luminal to basal phenotype and related therapeutic implications
Source: PubMed Central journal article supplement (PMC5978840; doi:10.1007/s00428-018-2354-9), 2018-04-13
Supplement: 428_2018_2354_MOESM2_ESM.pdf [file 428_2018_2354_MOESM2_ESM.pdf]

**Progression of urothelial carcinoma *in situ* of the urinary bladder:  
a switch from luminal to basal phenotype and related therapeutic implications**

Isabella Barth, Ursula Schneider, Tobias Grimm, Alexander Karl, David Horst, Nadine T. Gaisa,

Ruth Knüchel and Stefan Garczyk

Corresponding author:

Prof. Dr. med. Ruth Knüchel  
Institute of Pathology  
University Hospital RWTH Aachen  
Pauwelsstrasse 30, 52074 Aachen, Germany  
Email: rkneuchel-clarke@ukaachen.de

|                                        | all CIS cases<br>n=156 (100%) |       |
|----------------------------------------|-------------------------------|-------|
| pre-treatment                          |                               |       |
| previously untreated CIS               | 96                            | (62%) |
| previous BCG treatment                 | 37                            | (24%) |
| previous Mitomycin treatment           | 10                            | (6%)  |
| previous BCG and Mitomycin treatment   | 4                             | (3%)  |
| no data available                      | 9                             | (6%)  |
| type of biopsy                         |                               |       |
| TUR                                    | 146                           | (94%) |
| Cystectomy                             | 10                            | (6%)  |
| Variant CIS growth pattern             |                               |       |
| pagetoid CIS cell spread               | 37                            | (24%) |
| denuding morphology                    | 36                            | (23%) |
| pagetoid and denuding growth pattern   | 10                            | (6%)  |
| no pagetoid or denuding growth pattern | 73                            | (47%) |

**Online resource 2: Clinicopathological data**

Abbreviations: BCG – Bacillus Calmette-Guérin, CIS – Carcinoma in situ, TUR – Transurethral resection
