# Supplementary material for: Progression of urothelial carcinoma in situ of the urinary bladder: a switch from luminal to basal phenotype and related therapeutic implications
Source: Springer Nature journal article supplement (doi:10.1007/s00428-018-2354-9), 2018-04-13
Supplement: MOESM3 [file 15633192]

## Progression of urothelial carcinoma *in situ* of the urinary bladder:

### a switch from luminal to basal phenotype and related therapeutic implications

Isabella Barth, Ursula Schneider, Tobias Grimm, Alexander Karl, David Horst, Nadine T. Gaisa,

Ruth Knüchel and Stefan Garczyk

Corresponding author:

Prof. Dr. med. Ruth Knüchel

Institute of Pathology

University Hospital RWTH Aachen

Pauwelsstrasse 30, 52074 Aachen, Germany

Email: rknuechel-clarke@ukaachen.de

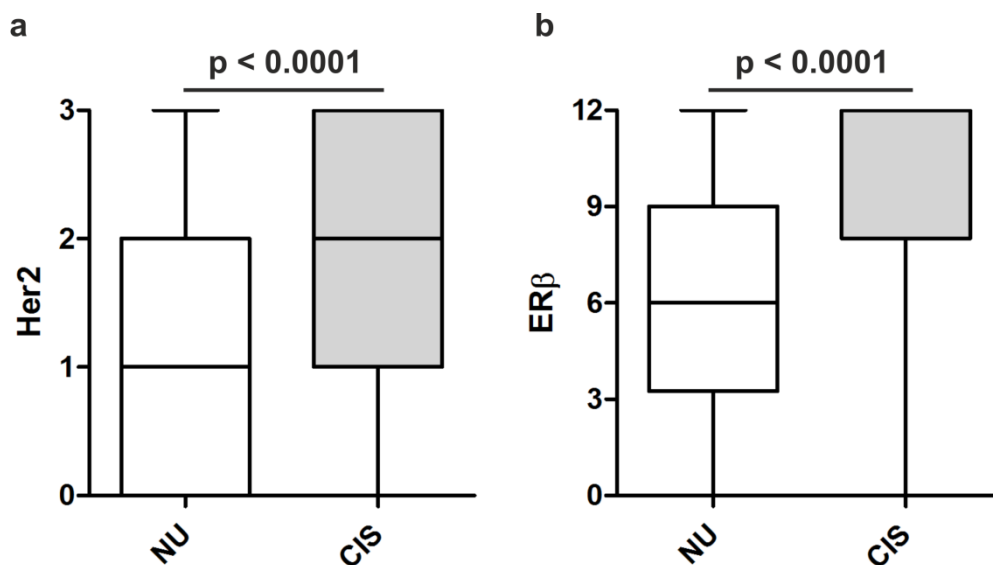

#### Online resource 3: Comparison of Her2 and ERβ expression in CIS and NU

(a) Her2 expression (Dako score) and (b) ERβ expression (Remmele Score) were compared in CIS and normal urothelium at the same time of biopsy in 84 cases with available normal urothelium. A significantly higher expression of both proteins was observed in the CIS cohort, highlighting the potential of intravesical anti-Her2 and anti-ERβ therapies.

Abbreviations: CIS – Carcinoma in situ, ER – Estrogen receptor, Her2 – Human epidermal growth factor receptor 2, NU – normal urothelium
